# Supplementary material for: Reversible phase transition of the 1 : 1 co-crystal of 1,4-diazabicyclo-[2.2.2]octane (DABCO) and hydroquinone,
Source: Royal Society of Chemistry journal article supplement (doi:10.1039/b923314h), 2010-01-01
Supplement: b923314h.pdf [file b923314h.pdf]

## Supplementary Materials

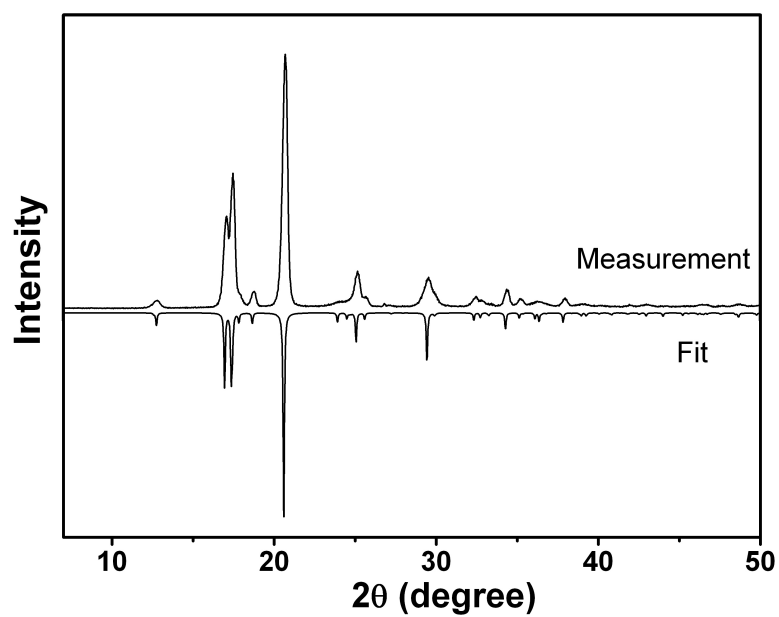

Fig. S1 The PXR diagram of compound **I** at room temperature.

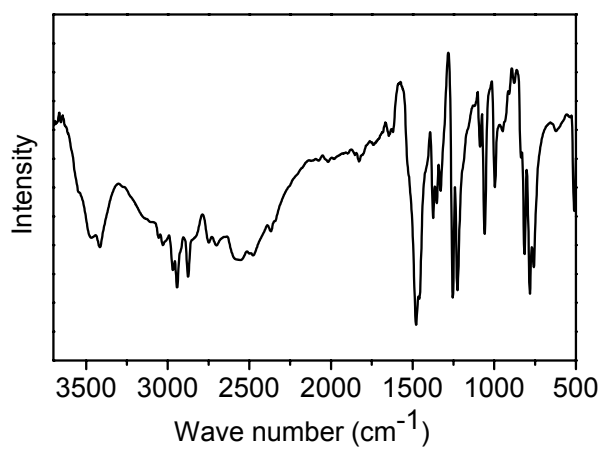

Fig. S2 The IR Spectrum of compound **I** at room temperature.
